# Supplementary material for: Transparent Development of the WHO Rapid Advice Guidelines
Source: PubMed Central journal article supplement (PMC1877972; doi:10.1371/journal.pmed.0040119), 2007-05-29
Supplement: pmed.0040119.sd012.pdf [file pmed.0040119.sd012.pdf]

**ບົດຄັດຫຍໍ້**

**ຄວາມເປັນມາ:** ບັນຫາສຸກເສີນທາງດ້ານສາທາລະນະສຸກ ແມ່ນຕ້ອງການຄຳແນະນຳໃນທັນທີທັນໃດ. ໃນທີ່ນີ້ ພວກເຮົາໄດ້ພັນລະນາກ່ຽວກັບ ການພັດທະນາ ແລະການທົດສອບ ແນວທາງ ຢ່າງເປັນຫລັກການ ແລະໂປ່ງໃສ (ທີ່ທາງອົງການອານາໄມໂລກເຄີຍໄຊ້ມາແລ້ວ) ເພື່ອເປັນບ່ອນອີງໃນການຂຽນເປັນປຶ້ມຄູ່ມືສຳລັບໃຫ້ຄຳແນະນຳຢ່າງທັນການ ແນໃສ່ຕອບສະໜອງຕາມຄວາມຮຽກຮ້ອງຕ້ອງການຂອງບັນດາປະເທດສະມາຊິກ ທີ່ກຳລັງປະເຊີນໜ້າກັບຄວາມບໍ່ແນ່ນອນໃນເລື່ອງການປິ່ນປົວພະຍາດໄຂ້ຫວັດສັດປົກ ທີ່ເກີດຈາກການຕິດເຊື້ອ ໄວຣັສ H5N1.

**ວິທີການສຶກສາຄົ້ນຄວ້າ:** ພວກເຮົາໄດ້ທຳການທົບທວນຜົນຈາກການຄົ້ນຄວ້າແບບຊຸ່ມ ກ່ຽວກັບການປິ່ນປົວ ແລະປ້ອງກັນພະຍາດໄຂ້ຫວັດທີ່ເກີດຕາມລະດູການ ແລະ ທົບທວນຂໍ້ມູນຫລັກຖານທີ່ບໍ່ໄດ້ທຳການຄົ້ນຄວ້າ ໃນເລື່ອງການຕິດເຊື້ອໄວຣັສ H5N1, ລວມທັງໄດ້ທົບທວນບົດລາຍງານກຳລະນິຄົນເຈັບ, ການສຶກສາຄົ້ນຄວ້າ ໃນສັດ ແລະໃນຫລອດທົດລອງ ແລ້ວນຳມາສັງລວມໄວ້ເປັນຕາຕະລາງຈຳນວນໜຶ່ງ. ຈາກນັ້ນ ກໍ່ໄດ້ຈັດໃຫ້ມີການປະຊຸມຂຶ້ນເປັນເວລາ 2 ວັນ ໂດຍໄດ້ເຊື່ອເອົາຜູ້ຊ່ຽວຊານທາງດ້ານກລິນິກ, ແພດໝໍທີ່ມີປະສົບປະການໃນການປິ່ນປົວຄົນເຈັບຕິດເຊື້ອ H5N1, ນັກຄົ້ນຄວ້າກ່ຽວກັບພະຍາດໄຂ້ຫວັດ ແລະນັກວິໄຈທາງສະຖິຕິການແພດເຂົ້າຮ່ວມ. ກ່ອນການປະຊຸມ, ຜູ້ເຂົ້າຮ່ວມປະຊຸມໄດ້ທຳການທົບທວນຂໍ້ມູນຫລັກຖານທັງໝົດ ພ້ອມທັງເຫັນດີໃນເລື່ອງຂັ້ນຕອນຂອງການປະຊຸມຢ່າງເປັນເອກະພາບກັນກ່ອນແລ້ວ.

**ຜົນຂອງການສຶກສາ:** ພວກເຮົາໄຊ້ເວລາ 1 ເດືອນ ໃນການຈັດຕັ້ງທີມງານເພື່ອເກັບກຳຂໍ້ມູນຫລັກຖານທັງໝົດ. ພາຍຫລັງທີ່ທີມງານຖືກແຕ່ງຕັ້ງຂຶ້ນ, ແມ່ນໄຊ້ເວລາພຽງແຕ່ 5 ອາທິດ ໃນການຈັດຫາ ແລະທົບທວນຂໍ້ມູນຫລັກຖານ ລວມທັງການຮ່າງປຶ້ມຄູ່ມື ຂຶ້ນ ກ່ອນທີ່ຈະຈັດໃຫ້ມີການປະຊຸມຄະນະກຳມະການ. ຫລັງຈາກການປະຊຸມຄະນະກຳມະການສິ້ນສຸດລົງ, ກໍ່ໄດ້ຮ່າງບົດທີ່ຈະຕຽມນຳໄປຕີພິມເຜີຍແຜ່ ຊຶ່ງໄຊ້ເວລາສຳລັບການກະກຽມພຽງ 10 ວັນ. ຈຸດຕິຂອງຂັ້ນຕອນການຕຽມງານຄັ້ງນີ້ ແມ່ນໄດ້ແກ່ຄວາມໂປ່ງໃສ ແລະການໄຊ້ເວລາທີ່ສິ້ນ ສຳລັບຂຽນປຶ້ມຄູ່ມືຂອງອົງການອານາໄມໂລກເຫລື້ອນີ້. ພວກເຮົາສາມາດເຮັດໃຫ້ຂັ້ນຕອນນີ້ດີຂຶ້ນຕື່ມ ດ້ວຍການເຮັດໃຫ້ເວລາທີ່ຕ້ອງການເຂົ້າໃນການຈັດຫາຂໍ້ມູນຫລັກຖານນັ້ນສິ້ນລົງຕື່ມ. ເຖິງຢ່າງໃດກໍ່ຕາມ, ຍັງມີຄວາມຈຳເປັນທີ່ຈະຕ້ອງເອື້ອອຳນວຍ ໃຫ້ມີການປະກອບສ່ວນຈາກຫລາຍຝ່າຍຕື່ມອີກ, ແລະຕ້ອງມີການປະເມີນ ແລະຮັບປະກັນໃຫ້ເຫັນວ່າ ປຶ້ມຄູ່ມືເຫລື້ອນີ້ກ່າວແມ່ນມີປະໂຫຍດຢ່າງແທ້ຈິງ.

**ຄວາມໝາຍຂອງການສຶກສານີ້:** ການສຶກສານີ້ຊີ້ໃຫ້ເຫັນວ່າ ມັນເປັນໄປໄດ້ທີ່ເຮົາຈະສ້າງຄູ່ມືສຳລັບໃຫ້ຄຳແນະນຳ ຈາກຂໍ້ມູນຫລັກຖານຕົວຈິງ ຢ່າງເປັນຫລັກການ ແລະໂປ່ງໃສໄດ້ ຊຶ່ງໄຊ້ເວລາສິ້ນງຽງ 2 ເດືອນ

ເທົ່ານັ້ນ. ເຖິງຢ່າງໃດກໍ່ຕາມ, ລາຄາໃນການສ້າງຄູ່ມືແບບນີ້ ແມ່ນຍັງຖືວ່າແພງເກີນໄປສຳລັບບັນດາປະເທດ ທີ່ມີລາຍຮັບໃນລະດັບຕ່ຳ ແລະປານກາງ ໃນຂະນະທີ່ມັນອາດເປັນການສື່ນເບື້ອງໂດຍບໍ່ມີປະໂຫຍດຫຍັງ ສຳລັບບັນດາປະເທດທີ່ມີລາຍຮັບສູງ ຊຶ່ງຈະຕ້ອງມາເຮັດຕາມຂັ້ນຕອນແບບນີ້ໂດຍບໍ່ຈຳເປັນອີກ. ຈາກການ ນຳໄຊ້ແນວທາງສຳລັບພັດທະນາເຄື່ອງມືແບບໄວວາເຊັ່ນນີ້, ອົງການອານາໄມໂລກ ຫລືອົງການຈັດຕັ້ງອື່ນໆ ສາມາດທີ່ຈະໃຫ້ການບໍລິການທີ່ສຳຄັນໃນລັກສະນະເຊັ່ນນີ້ໄດ້ ດ້ວຍການນຳໄຊ້ຂັ້ນຕອນທີ່ເປັນຫລັກການ ແລະໂປ່ງໃສ ຊຶ່ງອາດສາມາດນຳໄປປັບປຸງໃຫ້ແທດເໝາະກັບສະພາບຕົວຈິງຂອງແຕ່ລະປ່ອນ ເພື່ອໃຫ້ມີ ລັກສະນະງ່າຍດາຍຂຶ້ນຕື່ມ.

**ຂໍ້ຄວາມທີ່ສຳຄັນ:** guidelines; public health; infectious disease; evidence based medicine
