# Supplementary material for: Transparent Development of the WHO Rapid Advice Guidelines
Source: PubMed Central journal article supplement (PMC1877972; doi:10.1371/journal.pmed.0040119), 2007-05-29
Supplement: pmed.0040119.sd018.pdf [file pmed.0040119.sd018.pdf]

## भूमिका:

समय-समयमा देखा परिरहने नयाँ स्वास्थ्य समस्याहरूबारे यथाशीघ्र उचित निर्देशनहरू आवश्यक पर्दछन् । बर्डफ्लु (H5N1 Influenza) रोगको औषधोपचारबारे अनभिज्ञताको समस्या समाना गरेका सदस्य राष्ट्रहरूका अनुरोध बमोजिम विश्व स्वास्थ्य संगठनले निर्देशिका तयार पारेको थियो । सोही निर्देशिका बनाउन प्रयोग गरिएको विधिवत र पारदर्शी प्रणालीको यहाँ वर्णन गरिएको छ ।

## विधि :

शुरुमा संक्षिप्त तालिकाहरू बनाइयो । ती तालिकाहरूमा मौसमी ज्वरो (Seasonal Influenza) को उपचार र रोकथामको अध्ययन गर्न हालसम्म गरिएका समानुपातिक अध्ययन-परिक्षण (Randomized Trials) का विधिवत समीक्षाहरू राखियो । यसका साथै बर्डफ्लु रोगको अध्ययन-परिक्षण नगरिएका प्रमाणहरू (जस्तै: चिकित्साधीन रोगीको विवरण, जनावरमा गरिएका अध्ययन र कृत्रिम अवस्थामा गरिएका अध्ययन) पनि ती तालिकामा समावेश गरियो । त्यसपछि चिकित्साविद्, बर्डफ्लु रोगको उपचारमा अनुभवी डाक्टरहरू र मौसमी ज्वरोको अनुसन्धानमा संलग्न व्यक्तिहरू सहितको एक समिति गठन गरियो । सो समितिले एक दुई-दिन-लामो सभा गर्‍यो । त्यस पूर्व नै समितिका सदस्यहरूले प्रमाणहरूको अध्ययन गरेर तरिकामा सहमत भइसकेका थिए ।

## नतिजा:

विभिन्न अध्ययन र प्रमाणहरूको रूपरेखा तयार पार्ने टोली गठन गर्न मात्र ३० दिन लाग्यो । त्यति गरेपछि ३५ दिनभित्रै ती रूपरेखाको तालिका तयार भयो र संशोधन समेत पुरा भइ एक निर्देशिकाको प्रारूप तयार भयो र सो प्रारूप समितिको सभामा प्रस्तुत गरियो । सभाको १० दिनमा प्रकाशनको निमित्त एउटा निर्देशिकाको पाण्डुलिपीको प्रारूप तयार भयो । यो विश्व स्वास्थ्य संगठनको निर्देशिका तयार पार्न प्रयोग गरिएको प्रक्रिया पारदर्शी हुनु र छोटो समयमै पूरा हुनु यस प्रक्रियाका गुणहरू हुन् । प्रमाणहरूको रूपरेखा तयार गर्ने टोलीलाई खटाउन लाग्ने समयलाई छोट्याएर यो प्रक्रियालाई अझ सुधार्न सकिन्छ । सबै सम्बन्धित पक्षका संलग्नतालाई अनुकूल पार्न र निर्देशिकाको उपयोगिता मुल्याङ्कन र सुनिश्चित गर्न थप कार्य आवश्यक पर्नेछन् ।

## निष्कर्ष :

प्रमाणमा आधारित निर्देशिका विधिवत र पारदर्शी ढङ्गले दुई महिना भित्रै तयार गर्न सम्भव हुन्छ । तथापि, यो काम मध्य र निम्न आयवर्गका राष्ट्रहरूलाई अत्यन्तै खर्चिलो हुन्छ भने उच्च आयवर्गकाहरूलाई यो काम त्यसै दोहोर्‍याएर गर्नुपर्दा अपव्ययी हुन्छ । विभिन्न परिस्थितिमा प्रयोग गर्न अनुकूल, दरिलो र पारदर्शी प्रक्रिया प्रयोग गरेर विश्व स्वास्थ्य संगठन वा अरु संगठनहरू (जुन यथाशीघ्र निर्देशिका तयार पार्न विधिवत प्रणाली प्रयोग गर्छन् ) ले महत्वपूर्ण सेवा प्रदान गर्न सक्छन् ।

**मुख्य शब्दहरू :** निर्देशिका, जनस्वास्थ्य, संक्रामक रोग, प्रमाणमा आधारित चिकित्सा पद्धति
